# Supplementary material for: Motivations of Volunteers in Danish Grazing Organizations
Source: MDPI journal article supplement (doi:10.3390/su13158163), 2021-07-21

# Motivation among members of grazing organizations

Background information

\* Required

## 1. Which organization do you belong to \*

*Mark only one oval.*

- ☐ Arrenaes grazing organization (AN)
- ☐ Bondemosens grazing organization (BM)
- ☐ Copenhagen grazing organization (CPH)
- ☐ Dalbyhoj grazing organization (DH)
- ☐ Furesoe grazing organization (FS)
- ☐ Hjortespring nature conservation association (HS)
- ☐ Hojmosen grazing organization (HM)
- ☐ Jyllinge Holme sheep association (JH)
- ☐ Kasted fen grazing and conservation organization (KF)
- ☐ Kelleris grazing organization (KR)
- ☐ Kodriverne (KD)
- ☐ Konusserne (KN)
- ☐ Munksoegaard grazing organization (MSG)
- ☐ Nivaa sheep breeding association (NSBA)
- ☐ Petersminde grazing organization (PM)
- ☐ Saerlose grassland forest boar and grazing organization (SG)
- ☐ Slaglunde grazing organization (SL)
- ☐ Slotsmosens grazing organization (SLM)
- ☐ Soellerod nature conservation- & grazing organization (SOR)
- ☐ Sondermarkens grazing organization (SOM)
- ☐ Soroe grazing organization (SR)
- ☐ Svogerslev grazing organization (SVL)
- ☐ Taarnby conservation organization (TB)
- ☐ The grazing organization of Avedoere salt meadow (AS)
- ☐ Utterslev grazing organization (UG)

## 2. What is your gender? \*

*Check all that apply.*

- ☐ Male
- ☐ Female

**3. What is your age? \****Mark only one oval.*

- ☐ 16-20
- ☐ 21-30
- ☐ 31-40
- ☐ 41-50
- ☐ 51-60
- ☐ 71-80
- ☐ Older than 81

**4. What is your civil status? \****Check all that apply.*

- ☐ Single/Divorced
- ☐ Married
- ☐ Widowed
- ☐ Other: \_\_\_\_\_

**5. What is the age of your youngest child living at home? \****Mark only one oval.*

- ☐ 0-5 years
- ☐ 6-11 years
- ☐ Older than 12 years
- ☐ I have no children living at home
- ☐ Other: \_\_\_\_\_

**6. What is your occupation? \****Mark only one oval.*

- ☐ Studying
- ☐ Part-time employed
- ☐ Full-time employed
- ☐ Unemployed
- ☐ Retired

**7. What is your educational level? \****Mark only one oval.*

- ☐ Skilled
- ☐ Unskilled
- ☐ Short higher education
- ☐ Intermediate higher education
- ☐ Long higher education

**8. Where did your upbringing mainly take place? \****Mark only one oval.*

- ☐ In the countryside
- ☐ In the city
- ☐ In the suburbs
- ☐ Other: \_\_\_\_\_

**9. How much time do you use at transportation?(from you leave your door til you are at the enclosures) \****Mark only one oval.*

- ☐ Less than 5 minutes
- ☐ 5-15 minutes
- ☐ 16-30 minutes
- ☐ 31 minutes to an hour
- ☐ More than an hour

**10. How much time do your weekly spent, from you leave your home till you are home again, disribitutes across the year? \****Mark only one oval.*

- ☐ Less than an hour
- ☐ One hour
- ☐ Two hours
- ☐ Three hours
- ☐ More than three hours

**11. In the grazing organization, I am: \****Mark only one oval.*

- ☐ Member
- ☐ Chairman
- ☐ Vice chairman
- ☐ Cashier
- ☐ Support member (do not buy meat)

**12. In percentages how much time do you spent on:***Mark only one oval per row.*

|                                                                                                         | 0-<br>20%             | 20-<br>40%            | 40-<br>60%            | 60-<br>80%            | 80-<br>100%           | Ved ikke              |
|---------------------------------------------------------------------------------------------------------|-----------------------|-----------------------|-----------------------|-----------------------|-----------------------|-----------------------|
| Paperwork                                                                                               | <input type="radio"/> |
| Activities in and around the enclosure (incl. working days, animal supervision, social activities etc.) | <input type="radio"/> |
| Other                                                                                                   | <input type="radio"/> |

**13. How many years have you been part of the grazing organization?***Mark only one oval.*

- ☐ I have been here since the beginning
- ☐ More than 5 years
- ☐ 1-5 years
- ☐ less than 1 year

**14. Are you at the moment, member of another organization, doing voluntary work?***Mark only one oval.*

- ☐ Yes
- ☐ No

**Motivation**

Please rate the following statements on a scale from 'strongly disagree' to 'strongly agree'.

Strongly disagree: This statement does not at all describes me or my opinion/feeling

Disagree: I cannot or only to a small degree identify with this statement

Neither nor: I do not have an opinion on this statement

Agree; I can identify with this statement

Strongly agree: This statement precisely describes me as a person or my opinion/feeling

**15. How well does following statement describe you?***Mark only one oval per row.*

|                                                                                | Strongly disagree     | Disagree              | Neither nor           | Agree                 | Strongly agree        | I don't know          |
|--------------------------------------------------------------------------------|-----------------------|-----------------------|-----------------------|-----------------------|-----------------------|-----------------------|
| Through my membership, I learn about flora and fauna in Denmark                | <input type="radio"/> |
| The organizations social arrangements are important to me                      | <input type="radio"/> |
| I feel it is important to take care of / protect / improve nature              | <input type="radio"/> |
| Through the organization, I have been able to make a difference                | <input type="radio"/> |
| I find that, in the organization, we contribute to the local community         | <input type="radio"/> |
| Participating in the grazing organization gives me a new perspective on things | <input type="radio"/> |
| By being a member of the organization I can pass something on to other people  | <input type="radio"/> |
| The organization is, for me, a way to meet new people                          | <input type="radio"/> |
| I can share and pass on my knowledge and opinions about nature and animals     | <input type="radio"/> |
| I am concerned about loss of nature and biodiversity in Denmark                | <input type="radio"/> |
| I feel we today do enough to protect nature                                    | <input type="radio"/> |

## Motivation (continued)

### 16. How well does following statement describe you?

Mark only one oval per row.

|                                                                                                              | Strongly disagree     | Disagree              | Neither nor           | Agree                 | Strongly Agree        | I don't know          |
|--------------------------------------------------------------------------------------------------------------|-----------------------|-----------------------|-----------------------|-----------------------|-----------------------|-----------------------|
| I am a member of the organization because it provides good stories to tell family, friends and acquaintances | <input type="radio"/> |
| The people close to me believes it is important to make active efforts for nature                            | <input type="radio"/> |
| I am member of the organization primarily for the meat and /or wool of the animals                           | <input type="radio"/> |
| People in close to me support my decision to be a member of a grazing organization                           | <input type="radio"/> |
| I consider joining another organization within the next 5 years                                              | <input type="radio"/> |
| The organization provides an opportunity to protect and manage an area I feel linked to                      | <input type="radio"/> |
| The opinions, of people in my circle, are important to me                                                    | <input type="radio"/> |
| My experiences with the organization are personally enriching                                                | <input type="radio"/> |
| I am member of the organization, to associate with others                                                    | <input type="radio"/> |
| I am a member of the organization, because I enjoy spending time outdoors                                    | <input type="radio"/> |
| I expect to be a member of the organization, for at least the next 5 years                                   | <input type="radio"/> |

## Membership of the organization

You will be asked about your membership of the grazing organization.

### 17. My association with the organization is, that:

Check all that apply.

- ☐ Family members who are already members, encouraged me to join
- ☐ I found the organization through online, social or other media (e.. the local newspaper) and became a member
- ☐ Friends who are already members, encouraged me to join
- ☐ In advance, I had no association to the members of the organization
- ☐ Other: \_\_\_\_\_

**18. I am a member of the organization, because:***Mark only one oval per row.*

|                                                                                     | Very<br>unimportant   | unimportant           | Neither<br>nor        | Important             | Very<br>important     | I<br>don't<br>know    |
|-------------------------------------------------------------------------------------|-----------------------|-----------------------|-----------------------|-----------------------|-----------------------|-----------------------|
| We are actively doing something for nature                                          | <input type="radio"/> |
| We are activity doing something for animal welfare                                  | <input type="radio"/> |
| I am generally concerned about environmental issues                                 | <input type="radio"/> |
| I want to expand knowledge about nature, nature management and protection to others | <input type="radio"/> |
| I want to conserve and protect nature, for the future generations                   | <input type="radio"/> |

**19. I greatly share the organization's values according to:***Mark only one oval per row.*

|                                    | Strongly<br>disagree  | Disagree              | Neither<br>nor        | Agree                 | Strongly<br>agree     | I don't<br>know       |
|------------------------------------|-----------------------|-----------------------|-----------------------|-----------------------|-----------------------|-----------------------|
| The social activities              | <input type="radio"/> |
| Nature management                  | <input type="radio"/> |
| Animal welfare                     | <input type="radio"/> |
| Quality meat                       | <input type="radio"/> |
| Dissemination of nature management | <input type="radio"/> |

**20. Which of the following actions could be an additional motivation factor for continued membership?***Check all that apply.*

- ☐ Sightseeing, see, meet and learn from other organizations
- ☐ Courses related to the nature (gatherer trips, botanical trips and nature management)
- ☐ Courses related to the animals (care or meat)
- ☐ More animals
- ☐ A strengthened social network/community
- ☐ Different kind of animals
- ☐ To learn something
- ☐ Other: \_\_\_\_\_

**21. What have you learned by being a member?***Check all that apply.*

- ☐ I have learned to manage and care for nature habitats
- ☐ I have learned about the fauna (animals)
- ☐ I have learned to take care of "our" animals
- ☐ I have learn about the flora (vegetation)
- ☐ Other: \_\_\_\_\_

**22. What is your expectations, to the organization, as a member?***Mark only one oval per row.*

|                                                                        | Strongly disagree     | Disagree              | Neither nor           | Agree                 | Strongly agree        | I don't know          |
|------------------------------------------------------------------------|-----------------------|-----------------------|-----------------------|-----------------------|-----------------------|-----------------------|
| That I have an influence in organization                               | <input type="radio"/> |
| That participation and activities are flexible (time spent, knowledge) | <input type="radio"/> |
| That I get a tangible benefit (product or better nature)               | <input type="radio"/> |

**23. What has your membership of the organization, meant for your relationship to nature?***Mark only one oval per row.*

|                                                                      | Strongly disagree     | Disagree              | Neither nor           | Agree                 | Strongly agree        | I don't know          |
|----------------------------------------------------------------------|-----------------------|-----------------------|-----------------------|-----------------------|-----------------------|-----------------------|
| That I appreciate the nature we have in Denmark more                 | <input type="radio"/> |
| Generally, I find more joy in being in and using nature              | <input type="radio"/> |
| That I spent more time outdoors                                      | <input type="radio"/> |
| I do not think, that I spend more time in nature than before joining | <input type="radio"/> |
| I do not think, that I enjoy nature more after becoming a member     | <input type="radio"/> |
| I think it is an obligation/duty to take care of nature              | <input type="radio"/> |

**Explanatory questions****24. Are you interested in a union for grazing organizations in Denmark? If so, what should such a union offer?**


---



---



---



---



---

**25. What is the most satisfying of being a member of the organization?**


---



---



---



---



---

26. If you have any additional comment or opinion, feel free to share

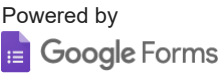

Supplement: s1 [file s1]
