# Supplementary material for: Motivations of Volunteers in Danish Grazing Organizations
Source: MDPI journal article supplement (doi:10.3390/su13158163), 2021-07-21
Supplement: s1 [file s1]

## Supplementary materiel for *Motivation among conservational grazing volunteers*

### Questionnaire

Please see attracted PDF file.

### Supplementary data

Table S1: Demographic data from the online questionnaire, complete sample (n = 347).

| Variable                          | Total sample |             |
|-----------------------------------|--------------|-------------|
|                                   | Count        | Percentages |
| <b>Gender</b>                     |              |             |
| Male                              | 185          | 53.3        |
| Female                            | 162          | 46.7        |
| <b>Age (years)</b>                |              |             |
| 16-20                             | 2            | 0.6         |
| 21-30                             | 13           | 3.7         |
| 31-40                             | 43           | 12.4        |
| 41-50                             | 64           | 18.4        |
| 51-60                             | 88           | 25.4        |
| 61-70                             | 94           | 27.1        |
| 71-80                             | 39           | 11.2        |
| Older than 80                     | 4            | 1.2         |
| <b>Civil status</b>               |              |             |
| Married                           | 275          | 79.3        |
| Relationship                      | 9            | 2.6         |
| Cohabitants                       | 20           | 5.8         |
| Single/Divorced                   | 40           | 11.5        |
| Widowed                           | 3            | 0.9         |
| <b>Children</b>                   |              |             |
| I have no children                | 10           | 2.9         |
| I have no children living at home | 204          | 58.8        |
| 0-5 years                         | 34           | 9.8         |
| 6-11 years                        | 35           | 10.1        |
| Older than 12 years               | 64           | 18.4        |
| <b>Education</b>                  |              |             |
| Unskilled                         | 10           | 2.9         |
| Skilled                           | 48           | 13.8        |
| Short higher education            | 22           | 6.3         |
| Intermediate higher education     | 123          | 35.4        |

|                   |                       |     |      |
|-------------------|-----------------------|-----|------|
| <b>Occupation</b> | Long higher education | 144 | 41.5 |
|                   | Unemployed            | 4   | 1.2  |
|                   | Studying              | 6   | 1.7  |
|                   | Part-time employed    | 38  | 11.0 |
|                   | Full-time employed    | 193 | 55.6 |
|                   | Retired               | 106 | 30.5 |
| <b>Upbringing</b> | In the countryside    | 124 | 35.7 |
|                   | In the suburbs        | 109 | 31.4 |
|                   | In the city           | 108 | 31.1 |
|                   | Other                 | 6   | 1.7  |
|                   |                       |     |      |

Table S2: Membership data from the online questionnaire, complete sample (n = 347).

| <b>Variables</b>                                  |                            | <b>Total sample</b> |             |
|---------------------------------------------------|----------------------------|---------------------|-------------|
| <b>Membership status</b>                          |                            | Count               | Percentages |
|                                                   | Chairman                   | 18                  | 5.2         |
|                                                   | Vice chairman              | 7                   | 2.0         |
|                                                   | Cashier                    | 10                  | 2.9         |
|                                                   | Member                     | 292                 | 84.1        |
|                                                   | Support member             | 20                  | 5.8         |
| <b>Years (of membership)</b>                      |                            |                     |             |
|                                                   | Less than 1 year           | 36                  | 10.4        |
|                                                   | 1-5 years                  | 115                 | 33.1        |
|                                                   | More than 5 years          | 82                  | 23.6        |
|                                                   | Member since the beginning | 114                 | 32.9        |
| <b>Time spent at enclosure related activities</b> |                            |                     |             |
|                                                   | 0-20%                      | 117                 | 33.7        |
|                                                   | 20-40%                     | 32                  | 9.2         |
|                                                   | 40-60%                     | 29                  | 8.4         |
|                                                   | 60-80%                     | 30                  | 8.6         |
|                                                   | 80-100%                    | 111                 | 32.0        |
|                                                   | I don't know/blank         | 28                  | 8.1         |
| <b>Time spent on administration(paperwork)</b>    |                            |                     |             |
|                                                   | 0-20%                      | 259                 | 74.6        |
|                                                   | 20-40%                     | 22                  | 6.3         |
|                                                   | 40-60%                     | 10                  | 2.9         |
|                                                   | 60-80%                     | 1                   | 0.3         |
|                                                   | 80-100%                    | 2                   | 0.6         |
|                                                   | I don't know/blank         | 53                  | 15.3        |
| <b>Time spent on other activities</b>             |                            |                     |             |
|                                                   | 0-20%                      | 142                 | 40.9        |
|                                                   | 20-40%                     | 17                  | 4.9         |
|                                                   | 40-60%                     | 4                   | 1.2         |
|                                                   | 60-80%                     | 2                   | 0.6         |
|                                                   | 80-100%                    | 3                   | 0.9         |
|                                                   | I don't know/blank         | 179                 | 51.6        |
| <b>Transportation time</b>                        |                            |                     |             |
|                                                   | Less than 5 minutes        | 59                  | 17.0        |
|                                                   | 5-15 minutes               | 172                 | 49.6        |
|                                                   | 16-30 minutes              | 76                  | 21.9        |
|                                                   | 31 minutes -1 hour         | 35                  | 10.1        |
|                                                   | More than 1 hour           | 5                   | 1.4         |

|                                                     |                                                              |     |      |
|-----------------------------------------------------|--------------------------------------------------------------|-----|------|
| <b>Time spent (incl. Transport)</b>                 |                                                              |     |      |
|                                                     | Less than 1 hour                                             | 171 | 49.3 |
|                                                     | 1 hour                                                       | 61  | 17.6 |
|                                                     | 2 hours                                                      | 33  | 9.5  |
|                                                     | 3 hours                                                      | 14  | 4.0  |
|                                                     | More than 3 hours                                            | 68  | 19.6 |
| <b>Membership of another voluntary organization</b> |                                                              |     |      |
|                                                     | Yes                                                          | 166 | 47.8 |
|                                                     | No                                                           | 179 | 51.6 |
|                                                     | Blank                                                        | 2   | 0.6  |
| <b>Organization</b>                                 |                                                              |     |      |
|                                                     | Arrenaes grazing organization (AN)                           | 25  | 7.2  |
|                                                     | Bondemosens grazing organization (BM)                        | 23  | 6.6  |
|                                                     | Copenhagen grazing organization (CPH)                        | 25  | 7.2  |
|                                                     | Dalbyhoj grazing organization (DH)                           | 8   | 2.3  |
|                                                     | Furesoe grazing organization (FS)                            | 9   | 2.6  |
|                                                     | Hjortespring nature conservation association (HS)            | 26  | 7.5  |
|                                                     | Hojmosen grazing organization (HM)                           | 26  | 7.5  |
|                                                     | Jyllinge Holme sheep association (JH)                        | 16  | 4.6  |
|                                                     | Kasted fen grazing and conservation organization (KF)        | 31  | 8.9  |
|                                                     | Kelleris grazing organization (KR)                           | 10  | 2.9  |
|                                                     | Kodriverne (KD)                                              | 2   | 0.6  |
|                                                     | Konusserne (KN)                                              | 7   | 2.0  |
|                                                     | Munksoegaard grazing organization (MSG)                      | 1   | 0.3  |
|                                                     | Nivaa sheep breeding association (NSBA)                      | 23  | 6.6  |
|                                                     | Petersminde grazing organization (PM)                        | 9   | 2.6  |
|                                                     | Saerlose grassland forest boar and grazing organization (SG) | 12  | 3.5  |
|                                                     | Slaglunde grazing organization (SL)                          | 17  | 4.9  |
|                                                     | Slotsmosens grazing organization (SLM)                       | 3   | 0.9  |
|                                                     | Soellerod nature conservation- & grazing organization (SOR)  | 12  | 3.5  |
|                                                     | Sondermarkens grazing organization (SOM)                     | 8   | 2.3  |
|                                                     | Soroe grazing organization (SR)                              | 19  | 5.5  |
|                                                     | Svogerslev grazing organization (SVL)                        | 8   | 2.3  |
|                                                     | Taarnby conservation organization (TB)                       | 3   | 0.9  |
|                                                     | The grazing organization of Avedoere salt meadow (AS)        | 9   | 2.6  |
|                                                     | Utterslev grazing organization (UT)                          | 15  | 4.3  |

Table S3: Responses to all opinion and attitude questions for the total sample, complete sample (n = 347).

| Variables                                                                          | Total sample       |             |
|------------------------------------------------------------------------------------|--------------------|-------------|
|                                                                                    | Count              | Percentages |
| <b>Motivation</b>                                                                  |                    |             |
| Q1: I am concerned about loss of nature and biodiversity in Denmark                | Strongly agree     | 151 43.5    |
|                                                                                    | Agree              | 129 37.2    |
|                                                                                    | Neither nor        | 41 11.8     |
|                                                                                    | Disagree           | 10 2.9      |
|                                                                                    | Strongly disagree  | 8 2.3       |
|                                                                                    | I don't know/blank | 8 2.3       |
|                                                                                    |                    |             |
| Q2: I feel it is important to take care of / protect / improve nature              | Strongly agree     | 217 62.5    |
|                                                                                    | Agree              | 98 28.2     |
|                                                                                    | Neither nor        | 13 3.7      |
|                                                                                    | Disagree           | 4 1.2       |
|                                                                                    | Strongly disagree  | 3 0.9       |
|                                                                                    | I don't know/blank | 12 3.5      |
|                                                                                    |                    |             |
| Q3: Through my membership, I learn about flora and fauna in Denmark                | Strongly agree     | 19 5.5      |
|                                                                                    | Agree              | 142 40.9    |
|                                                                                    | Neither nor        | 113 32.6    |
|                                                                                    | Disagree           | 50 14.4     |
|                                                                                    | Strongly disagree  | 15 4.3      |
|                                                                                    | I don't know/blank | 8 2.3       |
|                                                                                    |                    |             |
| Q4: Participating in the grazing organization gives me a new perspective on things | Strongly agree     | 41 11.8     |
|                                                                                    | Agree              | 149 42.9    |
|                                                                                    | Neither nor        | 104 30.0    |
|                                                                                    | Disagree           | 21 6.1      |
|                                                                                    | Strongly disagree  | 9 2.6       |
|                                                                                    | I don't know/blank | 23 6.6      |
|                                                                                    |                    |             |
| Q5: I feel we today do enough to protect nature                                    | Strongly agree     | 10 2.9      |
|                                                                                    | Agree              | 25 7.2      |
|                                                                                    | Neither nor        | 37 10.7     |
|                                                                                    | Disagree           | 154 44.4    |
|                                                                                    | Strongly disagree  | 112 32.3    |
|                                                                                    | I don't know/blank | 9 2.6       |
|                                                                                    |                    |             |

|                                                                                   |                    |     |      |
|-----------------------------------------------------------------------------------|--------------------|-----|------|
| Q6: I can share and pass on my knowledge and opinions about nature and animals    | Strongly agree     | 57  | 16.4 |
|                                                                                   | Agree              | 155 | 44.7 |
|                                                                                   | Neither nor        | 90  | 25.9 |
|                                                                                   | Disagree           | 25  | 7.2  |
|                                                                                   | Strongly disagree  | 6   | 1.7  |
|                                                                                   | I don't know/blank | 14  | 4.0  |
| Q7: By being a member of the organization I can pass something on to other people | Strongly agree     | 58  | 16.7 |
|                                                                                   | Agree              | 159 | 45.8 |
|                                                                                   | Neither nor        | 98  | 28.2 |
|                                                                                   | Disagree           | 16  | 4.6  |
|                                                                                   | Strongly disagree  | 3   | 0.9  |
|                                                                                   | I don't know/blank | 13  | 3.7  |
| Q8: The organization is, for me, a way to meet new people                         | Strongly agree     | 20  | 5.8  |
|                                                                                   | Agree              | 111 | 32.0 |
|                                                                                   | Neither nor        | 124 | 35.7 |
|                                                                                   | Disagree           | 52  | 15.0 |
|                                                                                   | Strongly disagree  | 29  | 8.4  |
|                                                                                   | I don't know/blank | 11  | 3.2  |
| Q9: The organizations social arrangements are important to me                     | Strongly agree     | 27  | 7.8  |
|                                                                                   | Agree              | 111 | 32.0 |
|                                                                                   | Neither nor        | 131 | 37.8 |
|                                                                                   | Disagree           | 48  | 13.8 |
|                                                                                   | Strongly disagree  | 21  | 6.1  |
|                                                                                   | I don't know/blank | 9   | 2.6  |
| Q10: I find that, in the organization, we contribute to the local community       | Strongly agree     | 104 | 30.0 |
|                                                                                   | Agree              | 149 | 42.9 |
|                                                                                   | Neither nor        | 52  | 15.0 |
|                                                                                   | Disagree           | 20  | 5.8  |
|                                                                                   | Strongly disagree  | 3   | 0.9  |
|                                                                                   | I don't know/blank | 19  | 5.5  |
| Q11: Through the organization, I have been able to make a difference              | Strongly agree     | 41  | 11.8 |
|                                                                                   | Agree              | 164 | 47.3 |

|                                                                                         |                    |     |      |
|-----------------------------------------------------------------------------------------|--------------------|-----|------|
|                                                                                         | Neither nor        | 97  | 28.0 |
|                                                                                         | Disagree           | 16  | 4.6  |
|                                                                                         | Strongly disagree  | 7   | 2.0  |
|                                                                                         | I don't know/blank | 22  | 6.3  |
| Q12: People close to me support my decision to be a member of a grazing organization    |                    |     |      |
|                                                                                         | Strongly agree     | 82  | 23.6 |
|                                                                                         | Agree              | 132 | 38.0 |
|                                                                                         | Neither nor        | 93  | 26.8 |
|                                                                                         | Disagree           | 9   | 2.6  |
|                                                                                         | Strongly disagree  | 2   | 0.6  |
|                                                                                         | I don't know/blank | 29  | 8.4  |
| Q13: The people close to me believes it is important to make active efforts for nature  |                    |     |      |
|                                                                                         | Strongly agree     | 58  | 16.7 |
|                                                                                         | Agree              | 160 | 46.1 |
|                                                                                         | Neither nor        | 86  | 24.8 |
|                                                                                         | Disagree           | 19  | 5.5  |
|                                                                                         | Strongly disagree  | 3   | 0.9  |
|                                                                                         | I don't know/blank | 21  | 6.1  |
| Q14: I am member of the organization primarily for the meat and /or wool of the animals |                    |     |      |
|                                                                                         | Strongly agree     | 49  | 14.1 |
|                                                                                         | Agree              | 96  | 27.7 |
|                                                                                         | Neither nor        | 81  | 23.3 |
|                                                                                         | Disagree           | 78  | 22.5 |
|                                                                                         | Strongly disagree  | 37  | 10.7 |
|                                                                                         | I don't know/blank | 6   | 1.7  |
| Q15: I am member of the organization, to associate/be with others                       |                    |     |      |
|                                                                                         | Strongly agree     | 10  | 2.9  |
|                                                                                         | Agree              | 65  | 18.7 |
|                                                                                         | Neither nor        | 147 | 42.4 |
|                                                                                         | Disagree           | 75  | 21.6 |
|                                                                                         | Strongly disagree  | 39  | 11.2 |
|                                                                                         | I don't know/blank | 11  | 3.2  |
| Q16: I am a member of the organization, because I enjoy spending time outdoors          |                    |     |      |
|                                                                                         | Strongly agree     | 91  | 26.2 |
|                                                                                         | Agree              | 172 | 49.6 |
|                                                                                         | Neither nor        | 51  | 14.7 |

|                                                                                                                    |                    |     |      |
|--------------------------------------------------------------------------------------------------------------------|--------------------|-----|------|
|                                                                                                                    | Disagree           | 15  | 4.3  |
|                                                                                                                    | Strongly disagree  | 6   | 1.7  |
|                                                                                                                    | I don't know/blank | 12  | 3.5  |
| Q17: I am a member of the organization, because it provides good stories to tell family, friends and acquaintances |                    |     |      |
|                                                                                                                    | Strongly agree     | 23  | 6.6  |
|                                                                                                                    | Agree              | 105 | 30.3 |
|                                                                                                                    | Neither nor        | 122 | 35.2 |
|                                                                                                                    | Disagree           | 62  | 17.9 |
|                                                                                                                    | Strongly disagree  | 22  | 6.3  |
|                                                                                                                    | I don't know/blank | 13  | 3.7  |
| Q18: I expect to be a member of the organization, for at least the next 5 years                                    |                    |     |      |
|                                                                                                                    | Strongly agree     | 121 | 34.9 |
|                                                                                                                    | Agree              | 155 | 44.7 |
|                                                                                                                    | Neither nor        | 32  | 9.2  |
|                                                                                                                    | Disagree           | 9   | 2.6  |
|                                                                                                                    | Strongly disagree  | 2   | 0.6  |
|                                                                                                                    | I don't know/blank | 28  | 8.1  |
| Q19: I consider joining another organization within the next 5 years                                               |                    |     |      |
|                                                                                                                    | Strongly agree     | 18  | 5.2  |
|                                                                                                                    | Agree              | 58  | 16.7 |
|                                                                                                                    | Neither nor        | 104 | 30.0 |
|                                                                                                                    | Disagree           | 77  | 22.2 |
|                                                                                                                    | Strongly disagree  | 27  | 7.8  |
|                                                                                                                    | I don't know/blank | 63  | 18.2 |
| Q20: The organization provides an opportunity to protect and manage an area, I feel connected to                   |                    |     |      |
|                                                                                                                    | Strongly agree     | 111 | 32.0 |
|                                                                                                                    | Agree              | 148 | 42.7 |
|                                                                                                                    | Neither nor        | 49  | 14.1 |
|                                                                                                                    | Disagree           | 19  | 5.5  |
|                                                                                                                    | Strongly disagree  | 4   | 1.2  |
|                                                                                                                    | I don't know/blank | 16  | 4.6  |
| Q21: My experiences with the organization are personally enriching                                                 |                    |     |      |
|                                                                                                                    | Strongly agree     | 67  | 19.3 |
|                                                                                                                    | Agree              | 175 | 50.4 |
|                                                                                                                    | Neither nor        | 78  | 22.5 |
|                                                                                                                    | Disagree           | 6   | 1.7  |
|                                                                                                                    | Strongly disagree  | 5   | 1.4  |
|                                                                                                                    | I don't know/blank | 16  | 4.6  |



|                                                                                          |                    |     |      |
|------------------------------------------------------------------------------------------|--------------------|-----|------|
| <hr/> Q22: The opinions, of people in my circle, are important to me                     |                    |     |      |
|                                                                                          | Strongly agree     | 21  | 6.1  |
|                                                                                          | Agree              | 147 | 42.4 |
|                                                                                          | Neither nor        | 119 | 34.3 |
|                                                                                          | Disagree           | 28  | 8.1  |
|                                                                                          | Strongly disagree  | 15  | 4.3  |
|                                                                                          | I don't know/blank | 17  | 4.9  |
| <b>Cause of membership:</b>                                                              |                    |     |      |
| LQ1: We are actively doing something for nature                                          |                    |     |      |
|                                                                                          | Very important     | 134 | 38.6 |
|                                                                                          | Important          | 150 | 43.2 |
|                                                                                          | Neither nor        | 50  | 14.4 |
|                                                                                          | Unimportant        | 5   | 1.4  |
|                                                                                          | Very unimportant   | 4   | 1.2  |
|                                                                                          | I don't know/blank | 4   | 1.2  |
| LQ2: We are activity doing something for animal welfare                                  |                    |     |      |
|                                                                                          | Very important     | 128 | 36.9 |
|                                                                                          | Important          | 158 | 45.5 |
|                                                                                          | Neither nor        | 48  | 13.8 |
|                                                                                          | Unimportant        | 5   | 1.4  |
|                                                                                          | Very unimportant   | 3   | 0.9  |
|                                                                                          | I don't know/blank | 5   | 1.4  |
| LQ3: I am generally concerned about environmental issues                                 |                    |     |      |
|                                                                                          | Very important     | 117 | 33.7 |
|                                                                                          | Important          | 144 | 41.5 |
|                                                                                          | Neither nor        | 59  | 17.0 |
|                                                                                          | Unimportant        | 15  | 4.3  |
|                                                                                          | Very unimportant   | 6   | 1.7  |
|                                                                                          | I don't know/blank | 6   | 1.7  |
| LQ4: I want to conserve and protect nature, for the future generations                   |                    |     |      |
|                                                                                          | Very important     | 164 | 47.3 |
|                                                                                          | Important          | 137 | 39.5 |
|                                                                                          | Neither nor        | 33  | 9.5  |
|                                                                                          | Unimportant        | 5   | 1.4  |
|                                                                                          | Very unimportant   | 3   | 0.9  |
|                                                                                          | I don't know/blank | 5   | 1.4  |
| LQ5: I want to expand knowledge about nature, nature management and protection to others |                    |     |      |
|                                                                                          | Very important     | 57  | 16.4 |
|                                                                                          | Important          | 119 | 34.3 |
| <hr/>                                                                                    |                    |     |      |

|                                                                             |                    |     |      |
|-----------------------------------------------------------------------------|--------------------|-----|------|
|                                                                             | Neither nor        | 117 | 33.7 |
|                                                                             | Unimportant        | 29  | 8.4  |
|                                                                             | Very unimportant   | 11  | 3.2  |
|                                                                             | I don't know/blank | 14  | 4.0  |
| <b>Expectations:</b>                                                        |                    |     |      |
| BQ1: That I have influence in organization                                  |                    |     |      |
|                                                                             | Strongly agree     | 35  | 10.1 |
|                                                                             | Agree              | 152 | 43.8 |
|                                                                             | Neither nor        | 107 | 30.8 |
|                                                                             | Disagree           | 25  | 7.2  |
|                                                                             | Strongly disagree  | 7   | 2.0  |
|                                                                             | I don't know/blank | 21  | 6.1  |
| BQ2: That participation and activities are flexible (time spent, knowledge) |                    |     |      |
|                                                                             | Strongly agree     | 105 | 30.3 |
|                                                                             | Agree              | 178 | 51.3 |
|                                                                             | Neither nor        | 35  | 10.1 |
|                                                                             | Disagree           | 6   | 1.7  |
|                                                                             | Strongly disagree  | 3   | 0.9  |
|                                                                             | I don't know/blank | 20  | 5.8  |
| BQ3: That I get a tangible benefit (product or better nature)               |                    |     |      |
|                                                                             | Strongly agree     | 121 | 34.9 |
|                                                                             | Agree              | 172 | 49.6 |
|                                                                             | Neither nor        | 34  | 9.8  |
|                                                                             | Disagree           | 8   | 2.3  |
|                                                                             | Strongly disagree  | 3   | 0.9  |
|                                                                             | I don't know/blank | 9   | 2.6  |
| <b>Shared values:</b>                                                       |                    |     |      |
| RQ1: The social activities                                                  |                    |     |      |
|                                                                             | Strongly agree     | 52  | 15.0 |
|                                                                             | Agree              | 130 | 37.5 |
|                                                                             | Neither nor        | 120 | 34.6 |
|                                                                             | Disagree           | 20  | 5.8  |
|                                                                             | Strongly disagree  | 8   | 2.3  |
|                                                                             | I don't know/blank | 17  | 4.9  |
| RQ2: Nature management                                                      |                    |     |      |
|                                                                             | Strongly agree     | 171 | 49.3 |
|                                                                             | Agree              | 145 | 41.8 |
|                                                                             | Neither nor        | 24  | 6.9  |
|                                                                             | Disagree           | 2   | 0.6  |
|                                                                             | Strongly disagree  | 0   | 0.0  |

|                                                                       |                    |     |      |
|-----------------------------------------------------------------------|--------------------|-----|------|
|                                                                       | I don't know/blank | 5   | 1.4  |
| RQ3: Animal welfare                                                   |                    |     |      |
|                                                                       | Strongly agree     | 176 | 50.7 |
|                                                                       | Agree              | 147 | 42.4 |
|                                                                       | Neither nor        | 17  | 4.9  |
|                                                                       | Disagree           | 1   | 0.3  |
|                                                                       | Strongly disagree  | 1   | 0.3  |
|                                                                       | I don't know/blank | 5   | 1.4  |
| RQ4: Quality meat                                                     |                    |     |      |
|                                                                       | Strongly agree     | 175 | 50.4 |
|                                                                       | Agree              | 128 | 36.9 |
|                                                                       | Neither nor        | 28  | 8.1  |
|                                                                       | Disagree           | 3   | 0.9  |
|                                                                       | Strongly disagree  | 3   | 0.9  |
|                                                                       | I don't know/blank | 10  | 2.9  |
| RQ5: Dissemination of nature management                               |                    |     |      |
|                                                                       | Strongly agree     | 117 | 33.7 |
|                                                                       | Agree              | 158 | 45.5 |
|                                                                       | Neither nor        | 57  | 16.4 |
|                                                                       | Disagree           | 5   | 1.4  |
|                                                                       | Strongly disagree  | 0   | 0.0  |
|                                                                       | I don't know/blank | 10  | 2.9  |
| <b>Nature relationship:</b>                                           |                    |     |      |
| GQ1: That I spent more time outdoors                                  |                    |     |      |
|                                                                       | Strongly agree     | 28  | 8.1  |
|                                                                       | Agree              | 117 | 33.7 |
|                                                                       | Neither nor        | 144 | 41.5 |
|                                                                       | Disagree           | 38  | 11.0 |
|                                                                       | Strongly disagree  | 9   | 2.6  |
|                                                                       | I don't know/blank | 11  | 3.2  |
| GQ2: That I appreciate the nature we have in Denmark more             |                    |     |      |
|                                                                       | Strongly agree     | 51  | 14.7 |
|                                                                       | Agree              | 126 | 36.3 |
|                                                                       | Neither nor        | 131 | 37.8 |
|                                                                       | Disagree           | 24  | 6.9  |
|                                                                       | Strongly disagree  | 6   | 1.7  |
|                                                                       | I don't know/blank | 9   | 2.6  |
| GQ3: I do not think. that I enjoy nature more after becoming a member |                    |     |      |
|                                                                       | Strongly agree     | 32  | 9.2  |
|                                                                       | Agree              | 81  | 23.3 |

|                                                                           |                    |     |      |
|---------------------------------------------------------------------------|--------------------|-----|------|
|                                                                           | Neither nor        | 114 | 32.9 |
|                                                                           | Disagree           | 86  | 24.8 |
|                                                                           | Strongly disagree  | 22  | 6.3  |
|                                                                           | I don't know/blank | 12  | 3.5  |
| GQ4: I do not think, that I spend more time in nature than before joining |                    |     |      |
|                                                                           | Strongly agree     | 44  | 12.7 |
|                                                                           | Agree              | 114 | 32.9 |
|                                                                           | Neither nor        | 86  | 24.8 |
|                                                                           | Disagree           | 85  | 24.5 |
|                                                                           | Strongly disagree  | 9   | 2.6  |
|                                                                           | I don't know/blank | 9   | 2.6  |
| GQ5: Generally, I find more joy in being in and using nature              |                    |     |      |
|                                                                           | Strongly agree     | 37  | 10.7 |
|                                                                           | Agree              | 106 | 30.5 |
|                                                                           | Neither nor        | 159 | 45.8 |
|                                                                           | Disagree           | 29  | 8.4  |
|                                                                           | Strongly disagree  | 7   | 2.0  |
|                                                                           | I don't know/blank | 9   | 2.6  |
| GQ6: I think it is an obligation/duty to take care of nature              |                    |     |      |
|                                                                           | Strongly agree     | 146 | 42.1 |
|                                                                           | Agree              | 149 | 42.9 |
|                                                                           | Neither nor        | 35  | 10.1 |
|                                                                           | Disagree           | 6   | 1.7  |
|                                                                           | Strongly disagree  | 4   | 1.2  |
|                                                                           | I don't know/blank | 7   | 2.0  |

**Table S4:** Result from the post hoc test for the Kruskal Wallis tests and ordinal ANOVA and regressions for the CLM (Cumulative Link Model). The different letters in Group indicates significant difference between the groups.

|                                                                            |                                                              |      |      |       |
|----------------------------------------------------------------------------|--------------------------------------------------------------|------|------|-------|
| Social                                                                     |                                                              |      |      |       |
| The organization is, for me, a way to meet new people                      |                                                              |      |      |       |
|                                                                            | Organization                                                 | mean | SE   | Group |
|                                                                            | Soellerod nature conservation- & grazing organization (SOR)  | 1.74 | 0.79 | a     |
|                                                                            | Saerlose grassland forest boar and grazing organization (SG) | 5.35 | 0.87 | c     |
|                                                                            | Age                                                          | mean | SE   | Group |
|                                                                            | 21-30                                                        | 1.43 | 0.75 | a     |
|                                                                            | 31-40                                                        | 2.16 | 0.62 | ab    |
|                                                                            | 41-50                                                        | 2.51 | 0.62 | abc   |
|                                                                            | 51-60                                                        | 2.94 | 0.6  | abc   |
|                                                                            | Older than 81                                                | 3.48 | 1.17 | abc   |
|                                                                            | 61-70                                                        | 3.69 | 0.64 | c     |
|                                                                            | 71-80                                                        | 3.96 | 0.78 | bc    |
|                                                                            | 16-20                                                        | 6.5  | 1.61 | bc    |
| The organizations social arrangements are important to me                  |                                                              |      |      |       |
|                                                                            | Organization                                                 | mean | SE   | Group |
|                                                                            | Soellerod grazing organization (SOR)                         | 0.1  | 0.7  | a     |
|                                                                            | Saerlose grassland forest boar and grazing organization (SG) | 3.43 | 0.77 | cd    |
| I am member of the organization, to associate/be with others               |                                                              |      |      |       |
|                                                                            | Organization                                                 | mean | SE   | Group |
|                                                                            | Soellerod nature conservation- & grazing organization (SOR)  | 0.52 | 0.67 | a     |
|                                                                            | Saerlose grassland forest boar and grazing organization (SG) | 4.87 | 0.79 | c     |
|                                                                            | Gender                                                       | mean | SE   | Group |
|                                                                            | Female                                                       | 1.91 | 0.45 | a     |
|                                                                            | Male                                                         | 2.37 | 0.45 | b     |
| Personal benefit                                                           |                                                              |      |      |       |
| I can share and pass on my knowledge and opinions about nature and animals |                                                              |      |      |       |
|                                                                            | Membership status                                            | mean | SE   | Group |
|                                                                            | Member                                                       | 1.17 | 0.22 | a     |
|                                                                            | Chairman                                                     | 2.59 | 0.52 | b     |
| I find that, in the organization, we contribute to the local community     |                                                              |      |      |       |
|                                                                            | Transportation                                               | mean | SE   | Group |
|                                                                            | 31 minutes -1 hour                                           | 0.3  | 0.3  | a     |
|                                                                            | More than 1 hour                                             | 0.94 | 0.85 | abc   |
|                                                                            | 16-30 minutes                                                | 1.32 | 0.23 | b     |
|                                                                            | 5-15 minutes                                                 | 1.83 | 0.18 | bc    |
|                                                                            | Less than 5 minutes                                          | 2.23 | 0.27 | c     |
| Through the organization, I have been able to make a difference            |                                                              |      |      |       |
|                                                                            | Education                                                    | mean | SE   | Group |
|                                                                            | Short higher education                                       | 0.81 | 0.45 | a     |
|                                                                            | Skilled                                                      | 2.33 | 0.36 | b     |
| Nature Value                                                               |                                                              |      |      |       |
| I feel it is important to take care of / protect / improve nature          |                                                              |      |      |       |
|                                                                            | Gender                                                       | mean | SE   | Group |
|                                                                            | Male                                                         | 2.18 | 0.27 | a     |
|                                                                            | Female                                                       | 2.69 | 0.3  | b     |
|                                                                            | Education                                                    | mean | SE   | Group |
|                                                                            | Short higher education                                       | 1.52 | 0.41 | a     |
|                                                                            | Skilled                                                      | 2.32 | 0.33 | ab    |
|                                                                            | Long higher education                                        | 2.59 | 0.26 | ab    |

|                                                                                           |       |      |       |
|-------------------------------------------------------------------------------------------|-------|------|-------|
| Unskilled                                                                                 | 2.72  | 0.72 | ab    |
| Intermediate higher education                                                             | 3.03  | 0.29 | b     |
| <b>I feel we today do enough to protect nature</b>                                        |       |      |       |
| Gender                                                                                    | mean  | SE   | Group |
| Female                                                                                    | -0.86 | 0.38 | a     |
| Male                                                                                      | -0.41 | 0.37 | b     |
| Upbringing                                                                                | mean  | SE   | Group |
| In the city                                                                               | -0.78 | 0.36 | a     |
| In the countryside                                                                        | -0.01 | 0.37 | b     |
| <b>Identification</b>                                                                     |       |      |       |
| <b>My experiences with the organization are personally enriching</b>                      |       |      |       |
| Organization                                                                              | mean  | SE   | Group |
| Soellerod grazing organization (SOR)                                                      | -0.01 | 0.58 | a     |
| Hjortespring nature conservation association (HS)                                         | 2.4   | 0.46 | b     |
| Soroe grazing organization (SR)                                                           | 2.7   | 0.54 | b     |
| <b>People in close to me support my decision to be a member of a grazing organization</b> |       |      |       |
| Gender                                                                                    | mean  | SE   | Group |
| Male                                                                                      | 1.23  | 0.24 | a     |
| Female                                                                                    | 1.75  | 0.27 | b     |
| Membership status                                                                         | mean  | SE   | Group |
| Support member                                                                            | 0.19  | 0.43 | a     |
| Chairman                                                                                  | 1     | 0.43 | ab    |
| Member                                                                                    | 1.28  | 0.14 | ab    |
| Cashier                                                                                   | 2.27  | 0.6  | b     |
| Vice chairman                                                                             | 2.71  | 0.68 | B     |
| <b>Instrumental</b>                                                                       |       |      |       |
| <b>I am member of the organization primarily for the meat and /or wool of the animals</b> |       |      |       |
| Age                                                                                       | mean  | SE   | Group |
| Older than 81                                                                             | -0.96 | 0.98 | ab    |
| 16-20                                                                                     | -0.72 | 1.3  | ab    |
| 71-80                                                                                     | -0.23 | 0.38 | a     |
| 61-70                                                                                     | 0.84  | 0.34 | b     |
| 51-60                                                                                     | 0.89  | 0.34 | b     |
| 41-50                                                                                     | 1.02  | 0.36 | b     |
| 21-30                                                                                     | 1.08  | 0.61 | ab    |
| 31-40                                                                                     | 1.55  | 0.41 | b     |
| Membership status                                                                         | mean  | SE   | Group |
| Support member                                                                            | -1.11 | 0.50 | a     |
| Vice chairman                                                                             | 0.28  | 0.74 | ab    |
| Chairman                                                                                  | 0.29  | 0.49 | ab    |
| Cashier                                                                                   | 1.26  | 0.59 | b     |
| Member                                                                                    | 1.44  | 0.26 | b     |
| Education                                                                                 | mean  | SE   | Group |
| Long higher education                                                                     | -0.57 | 0.34 | a     |
| Short higher education                                                                    | 0.95  | 0.49 | b     |

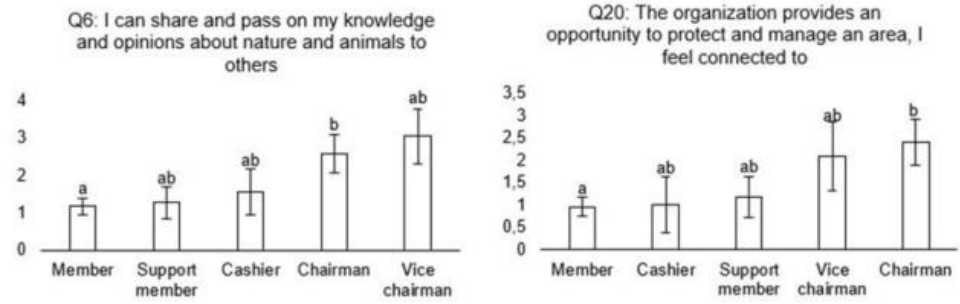

**Figure S1.** The likelihood of agreement with the motivation statements between members with different membership status.

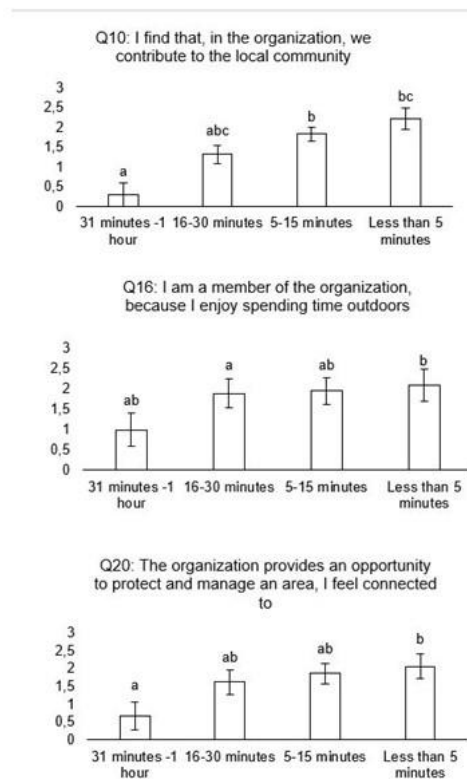

**Figure S2.** The likelihood of agreement with motivations statements between members with different transportation time.
